# Supplementary material for: Reevaluating Suicidal Behaviors: Comparing Assessment Methods to Improve Risk Evaluations
Source: Springer Nature journal article supplement (doi:10.1007/s10862-016-9566-6), 2016-08-15
Supplement: MOESM1 [file 10586168]

Supplementary Table 1

*Sample Characteristics*

|  | Study 1 | Study 2 | Study 3 | Total *M* |
| --- | --- | --- | --- | --- |
| Variable | (*n* = 359) | (*n* = 1007) | (*n* = 713) | (*N* = 2079) |
| Location | Singapore | Australia | Australia |  |
| Age in years | 18–73 (*M* = 27.88) | 18–76 (*M* = 30.43) | 18–71 (*M* = 31.48) | 18–76 (*M* = 30.38) |
| Female | 76.9% | 62.8% | 77.1% | 70.0% |
| Ethnicity |  |  |  |  |
| White | 43.2% | 82.3% | 68.2% | 70.3% |
| Asian | 56.0% | 12.2% | 19.5% | 19.7% |
| Other | 0.8% | 5.5% | 12.3% | 10.0% |
| Education |  |  |  |  |
| Not HS graduate | 1.1% | 7.8% | 1.5% | 4.5% |
| HS graduate | 32.6% | 16.7% | 27.3% | 23.1% |
| Some tertiary | 35.1% | 39.2% | 29.3% | 35.2% |
| Univ. graduate | 31.2% | 36.3% | 41.9% | 37.2% |
| Students | 42.1% | 1.7% | 0.0% | 8.1% |
| Diagnosed | 29.9% | 25.3% | 39.3% | 30.9% |

*Note*. All samples included participants covering the full range of assessed suicidal behaviors and scores on the Suicidal Affect-Behavior-Cognition Scale. Location = location of source of online and/or computer-administered survey. HS = high school. Some tertiary = vocational education or some university. Univ. graduate = completed university degree(s). Students = student participants (with credit incentives). Diagnosed = self-reported history of any psychiatric diagnosis.
